# Supplementary material for: Numerical modelling of land subsidence related to groundwater withdrawal in the Firenze-Prato-Pistoia basin (central Italy)
Source: Springer Nature journal article supplement (doi:10.1007/s10040-020-02255-2), 2020-10-31
Supplement: MOESM1 [file 18543010]

**Numerical modelling of land subsidence related to groundwater overexploitation in the Firenze-Prato-Pistoia basin (central Italy)**

Mattia Ceccatelli<sup>1</sup>, Matteo Del Soldato<sup>1</sup>, Lorenzo Solari<sup>2</sup>, Riccardo Fanti<sup>1</sup>, Gaddo Mannori<sup>3</sup>, Fabio Castelli<sup>1</sup>

<sup>1</sup> Department of Earth Sciences, University of Florence, Via G. La Pira 4, Florence 50121, Italy

<sup>2</sup> Centre Tecnològic de Telecomunicacions de Catalunya (CTTC), Division of Geomatics. Av. Gauss, 7 E-08860 Castelldefels (Spain)

<sup>3</sup> Freelance geologist, Largo San Biagio 149, Pistoia 51100, Italy

Corresponding author: Mattia Ceccatelli, Department of Earth Sciences, University of Florence, Via G. La Pira 4, Florence 50121, Italy. email: [mattia.ceccatelli@unifi.it](mailto:mattia.ceccatelli@unifi.it)

**Electronic supplementary material – Hydrogeology Journal**

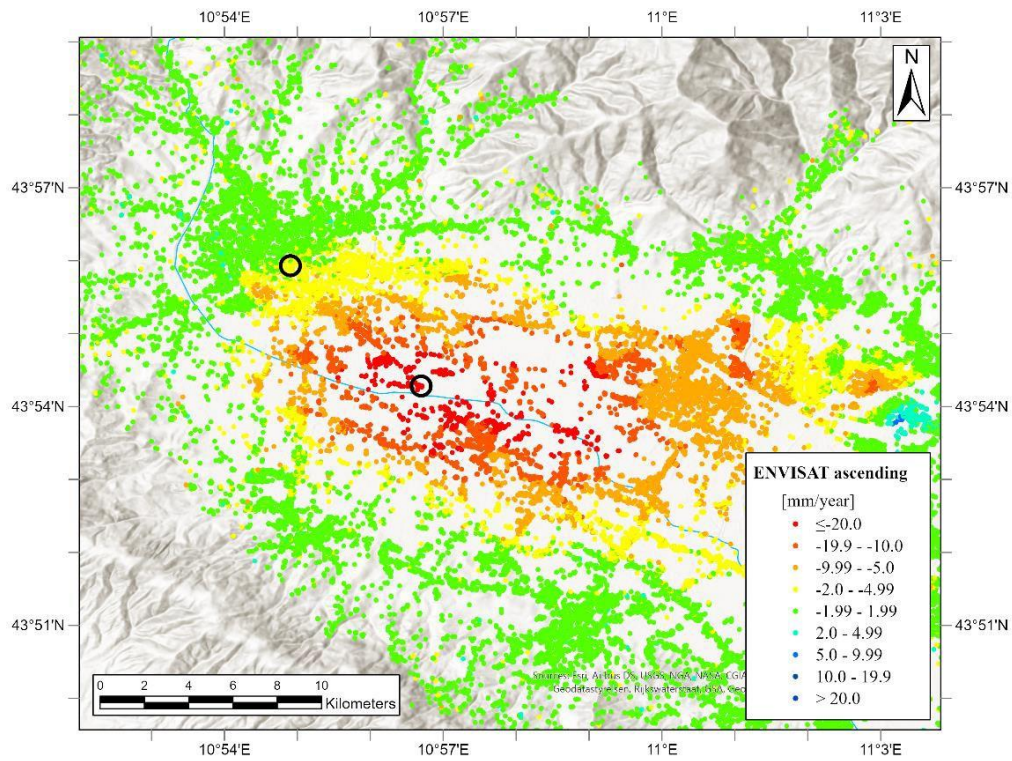

**Figure S1 – ENVISAT velocity map in ascending orbit. The reference period is 2003-2010. The black circles refer to the areas where representative time series are extracted (see section ‘PSI velocity maps’ in the main article).**

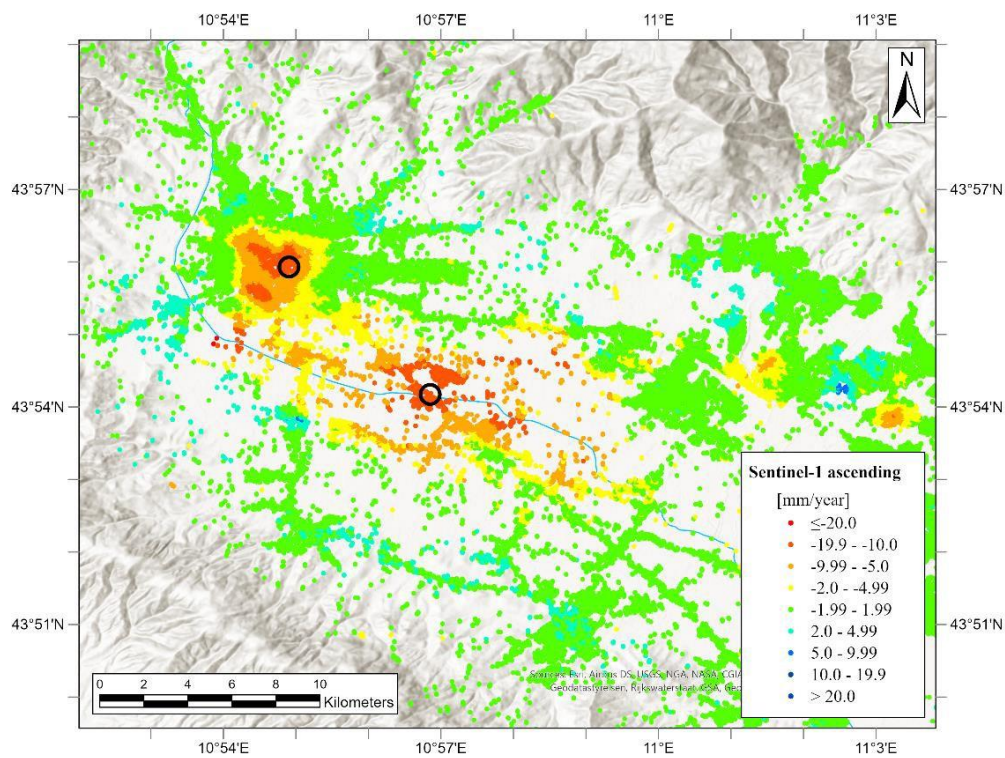

**Figure S2 – Sentinel-1 velocity map in ascending orbit. The reference period is 2003-2010. The black circles refer to the areas where representative time series are extracted (see section ‘PSI velocity maps’ in the main article).**

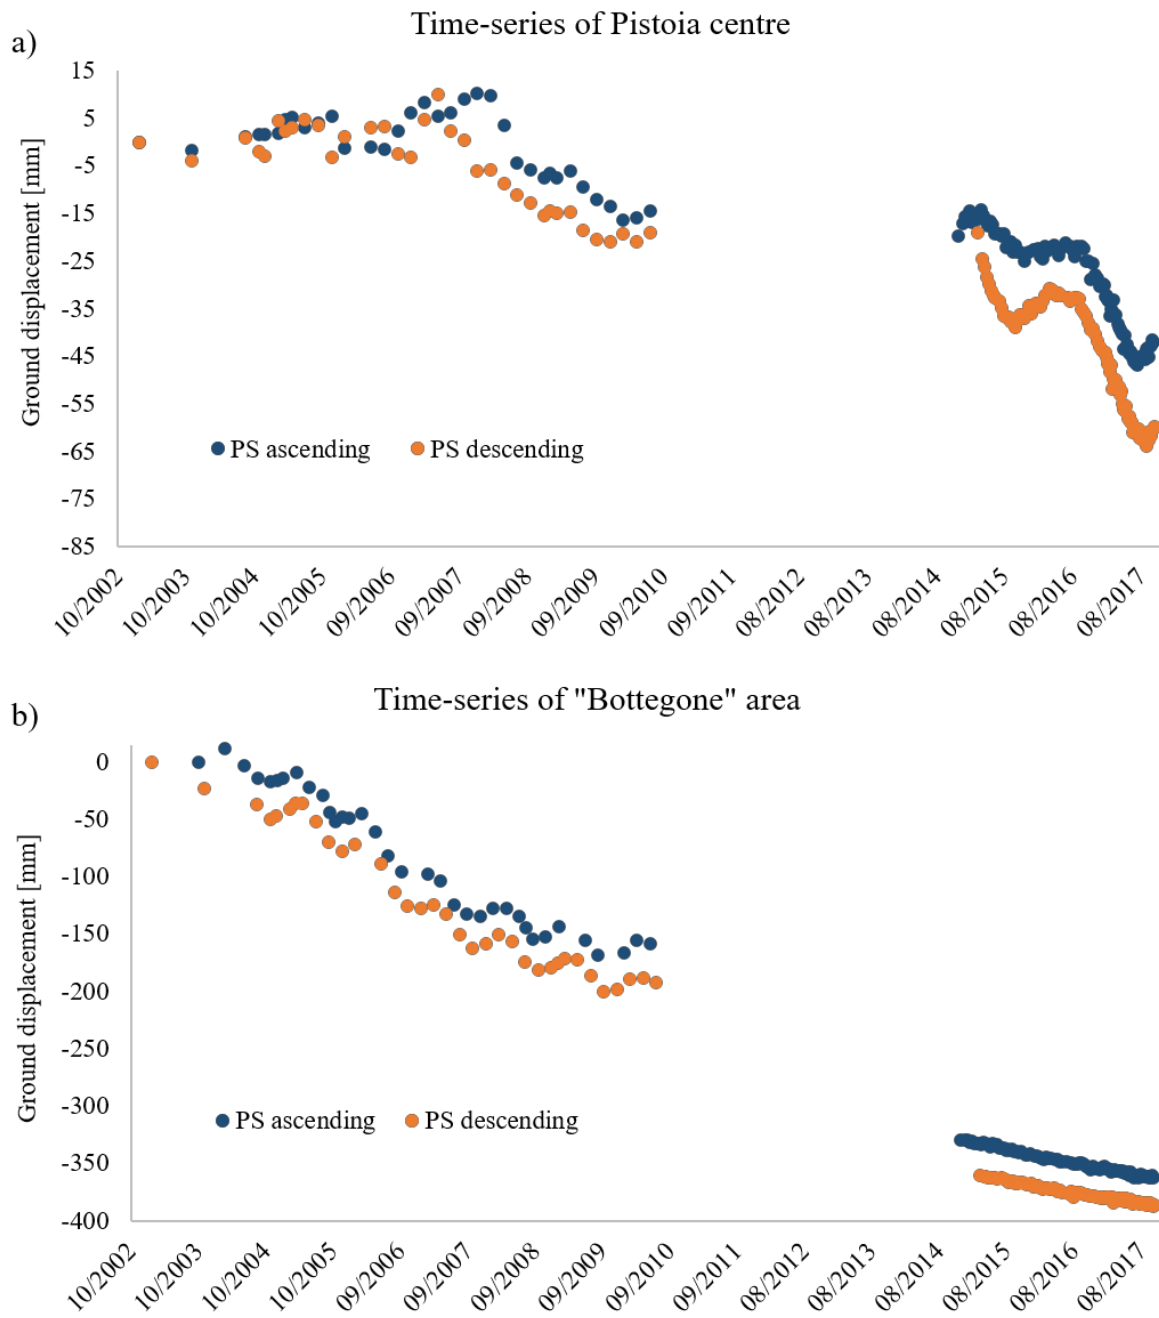

Figure S3 - Reference time series for the (a) Pistoia city center and (b) the area of Bottegone.

**Table S1 – Main characteristics of the PSI datasets used in this work. The MP density is calculated for the area of interest (~350 km<sup>2</sup>) in MP/km<sup>2</sup>. *Minimum coherence* refers to the minimum value of temporal coherence for the datasets. *Velocity std. dev.* and *Velocity range* refer to the value of standard deviation and range in mm/year for all the MP in the area of interest for the four datasets.**

| Satellite             | Orbit<br>(track number) | Reference<br>period      | N° of<br>images | N° of MP | MP<br>density | Minimum<br>coherence | Velocity<br>std. dev. | Velocity<br>range |
|-----------------------|-------------------------|--------------------------|-----------------|----------|---------------|----------------------|-----------------------|-------------------|
| ENVISAT               | A (444)                 | 10/06/2003<br>27/05/2010 | 35              | 52796    | 150.8         | 0.6                  | 0.95                  | -37 - 6.9         |
|                       | D (394)                 | 10/02/2003<br>19/04/2010 | 35              | 56045    | 160.2         | 0.6                  | 0.95                  | -39.2 - 5.3       |
| Sentinel-1<br>(SNT-1) | A (117)                 | 12/12/2014<br>09/10/2017 | 101             | 96682    | 276.4         | 0.8                  | 0.90                  | -21.5 – 7.0       |
|                       | D (168)                 | 22/03/2015<br>13/10/2017 | 98              | 102075   | 293.2         | 0.8                  | 0.80                  | -28.8 - 7.7       |

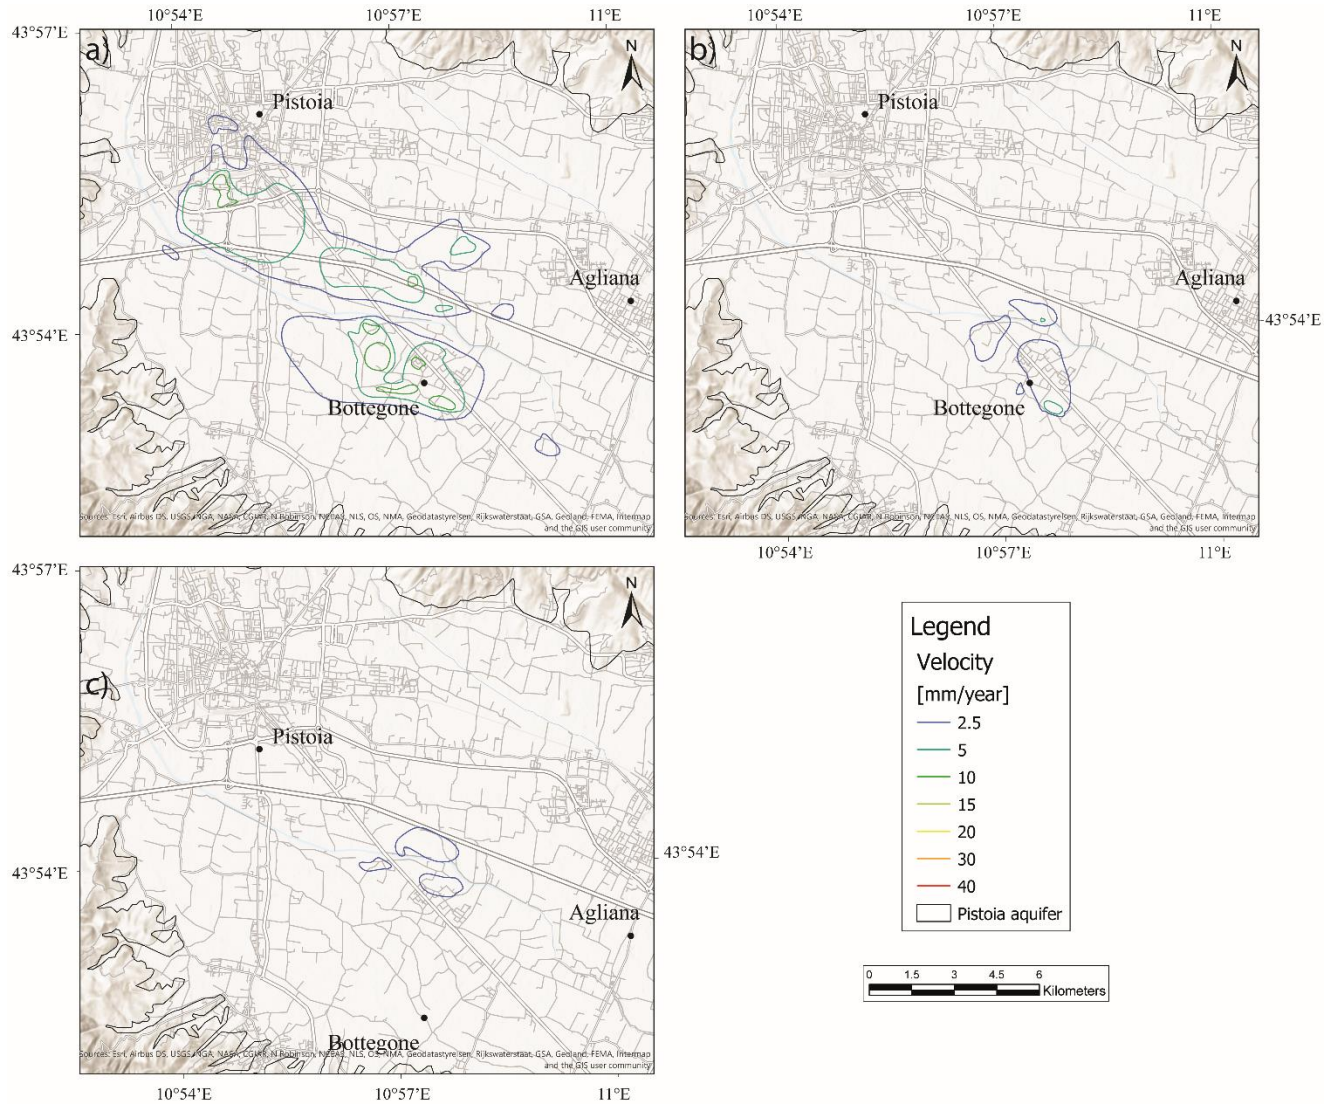

**Figure S4 - Time series of forecasted ground displacement in Pistoia area under the increasing pumping rate scenario for a) 2020-2030 period, b) 2030-2040 period and c) 2040-2050 period. Sources: Esri, Airbus DS, USGS, NGA, NASA, N. Robinson, NCEAS, NLS, OS, NMA, Geodatastyrelsen, Rijkswaterstaat, GSA, Geoland, FEMA, Intermap and the GIS user community.**

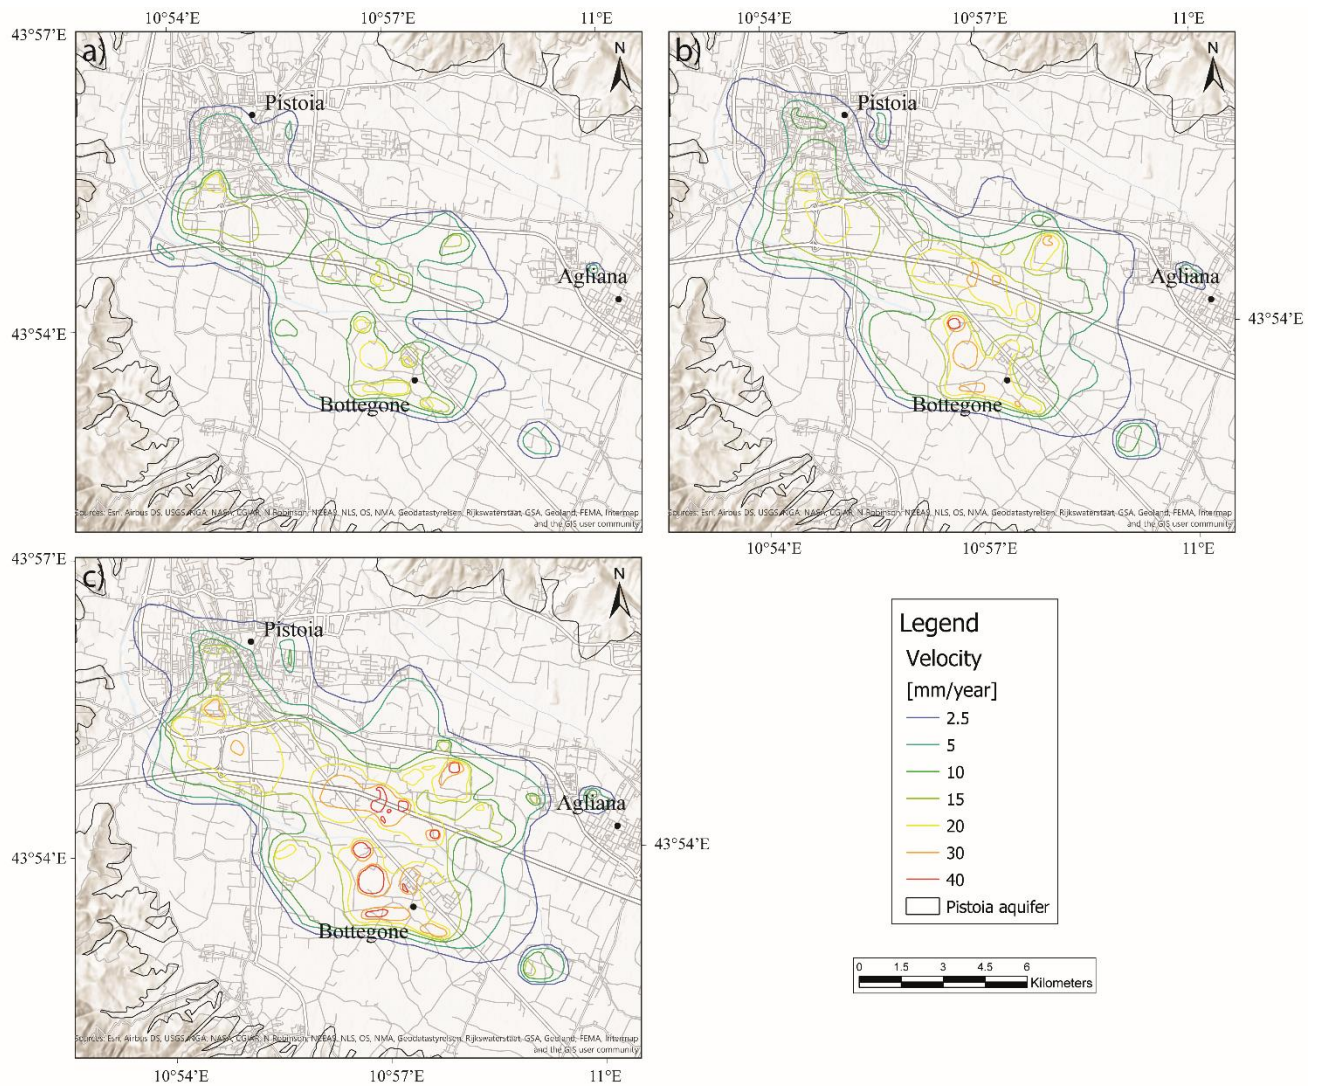

**Figure S5 - Time series of forecasted ground displacement in Pistoia area under the decreasing pumping rate scenario for a) 2020-2030 period, b) 2030-2040 period and c) 2040-2050 period. Sources: Esri, Airbus DS, USGS, NGA, NASA, N. Robinson, NCEAS, NLS, OS, NMA, Geodatastyrelsen, Rijkswaterstaat, GSA, Geoland, FEMA, Intermap and the GIS user community.**
